# Supplementary material for: Leitlinien: Gerüst für eine evidenzbasierte Versorgung
Source: Springer Nature journal article supplement (doi:10.1007/s41906-023-2179-2), 2023-10-17

# Algorithmus Behandlungsplan zum Beitrag „Leitlinien: Gerüst für eine evidenzbasierte Versorgung“

von Jörg Bunse, Brigitte Nink-Grebe, Falk Goedecke

PflegeZeitschrift (76) 11/2023, S. 30-33

**Quelle:** Deutsche Gesellschaft für Wundheilung und Wundbehandlung e.V. (DGfW) (Hrsg.) (2023). S3-Leitlinie Lokalthherapie von Wunden aufgrund von peripherer arterieller Verschlusskrankheit, Diabetes mellitus, chronischer venöser Insuffizienz. Version 2. Stand: 24.04.2023. AWMF-Register-Nr.: 091/001

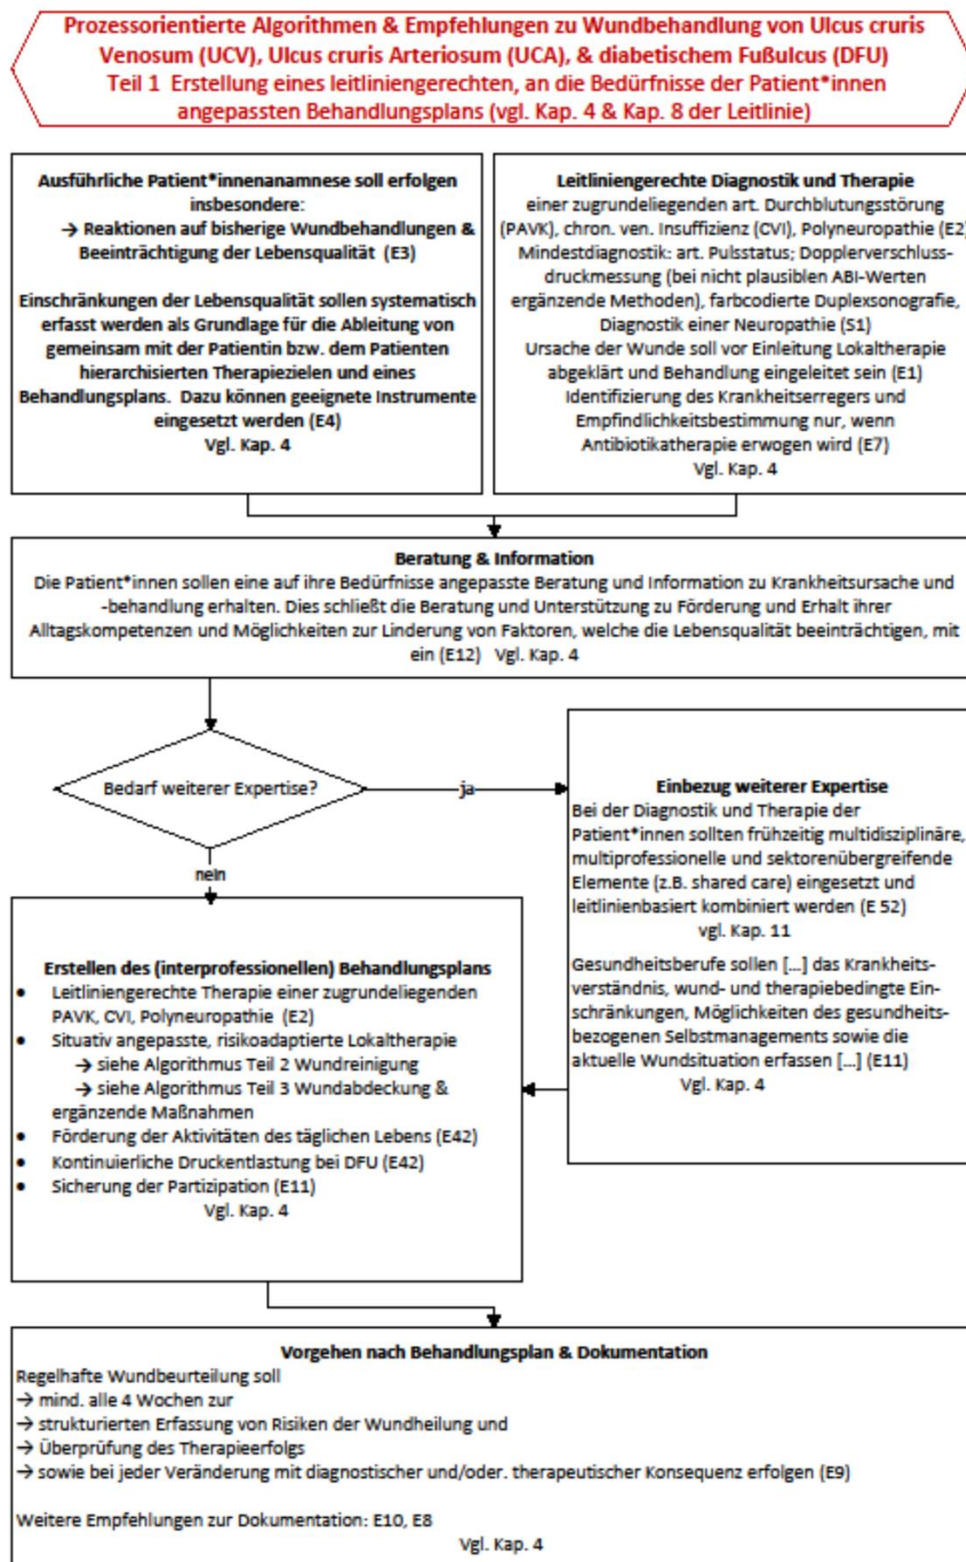

Supplement: MOESM1 [file 26193790]
